# Supplementary material
Source: PubMed Central journal article supplement (PMC4787633)
Supplement: Marc637553.ww1_default.pdf [file Marc637553.ww1_default.pdf]

USE OF VENLAFAXINE COMPARED WITH OTHER ANTIDEPRESSANTS AND THE RISK OF SUDDEN  
CARDIAC DEATH OR NEAR-DEATH: A NESTED CASE-CONTROL STUDY

## Supplemental Table 1

### Antidepressant use of cohort members in the year prior to cohort entry by the entry-defining antidepressant agent

|                                                             | Venlafaxine<br>(n = 19268) | Fluoxetine<br>(n = 90924) | Citalopram<br>(n = 53300) | Dosulepin<br>(n = 43892) |
|-------------------------------------------------------------|----------------------------|---------------------------|---------------------------|--------------------------|
| <b>Antidepressant use in the year prior to cohort entry</b> |                            |                           |                           |                          |
| Venlafaxine                                                 | 0 (0.0)                    | 288 (0.3)                 | 370 (0.7)                 | 150 (0.3)                |
| Fluoxetine                                                  | 1889 (9.8)                 | 0 (0.0)                   | 1591 (3.0)                | 1235 (2.8)               |
| Citalopram                                                  | 865 (4.5)                  | 654 (0.7)                 | 0 (0.0)                   | 299 (0.7)                |
| Dosulepin                                                   | 813 (4.2)                  | 2574 (2.8)                | 1224 (2.3)                | 0 (0.0)                  |
| Other SSRIs                                                 | 6421 (33.3)                | 7587 (8.3)                | 6192 (11.6)               | 4526 (10.3)              |
| Tricyclics                                                  | 3502 (18.2)                | 10052 (11.1)              | 5929 (11.1)               | 5097 (11.6)              |
| MAO inhibitors                                              | 146 (0.8)                  | 127 (0.1)                 | 87 (0.2)                  | 42 (0.1)                 |
| Other antidepressants                                       | 1211 (6.3)                 | 1225 (1.3)                | 1111 (2.1)                | 765 (1.7)                |
| <b>Number of antidepressants</b>                            |                            |                           |                           |                          |
| 0                                                           | 7478 (38.8)                | 71058 (78.2)              | 39053 (73.3)              | 33386 (76.1)             |
| 1                                                           | 8793 (45.6)                | 16849 (18.5)              | 11883 (22.3)              | 8716 (19.9)              |
| 2                                                           | 2420 (12.6)                | 2532 (2.8)                | 1959 (3.7)                | 1499 (3.4)               |
| >2                                                          | 577 (3.0)                  | 485 (0.5)                 | 405 (0.8)                 | 291 (0.7)                |
| <b>Antidepressant prescribed on the day of cohort entry</b> |                            |                           |                           |                          |
| Venlafaxine                                                 | 19268 (100.0)              | 6 (0.0)                   | 7 (0.0)                   | 12 (0.0)                 |
| Fluoxetine                                                  | 44 (0.2)                   | 90924 (100.0)             | 14 (0.0)                  | 35 (0.1)                 |
| Citalopram                                                  | 24 (0.1)                   | 15 (0.0)                  | 53300 (100.0)             | 11 (0.0)                 |
| Dosulepin                                                   | 48 (0.2)                   | 128 (0.1)                 | 86 (0.2)                  | 43892 (100.0)            |
| Other SSRIs                                                 | 154 (0.8)                  | 100 (0.1)                 | 71 (0.1)                  | 188 (0.4)                |
| Tricyclics                                                  | 169 (0.9)                  | 507 (0.6)                 | 340 (0.6)                 | 69 (0.2)                 |
| MAO inhibitors                                              | 2 (0.0)                    | 0 (0.0)                   | 0 (0.0)                   | 2 (0.0)                  |
| Other antidepressants                                       | 86 (0.4)                   | 49 (0.1)                  | 89 (0.2)                  | 52 (0.1)                 |

Results are expressed as Number (%) or Mean ± SD

**Supplemental Table 2**

**Characteristics of cohort members at or prior to cohort entry by cohort entry-defining antidepressant agent**

|                                                                       | <b>Venlafaxine<br/>(n = 19268)</b> | <b>Fluoxetine<br/>(n = 90924)</b> | <b>Citalopram<br/>(n = 53300)</b> | <b>Dosulepin<br/>(n = 43892)</b> |
|-----------------------------------------------------------------------|------------------------------------|-----------------------------------|-----------------------------------|----------------------------------|
| Enrollment duration at cohort entry (yrs)                             | 7.8 ± 4.2                          | 7.8 ± 3.7                         | 8.4 ± 4.3                         | 7.3 ± 3.3                        |
| Follow-up time (yrs)                                                  | 2.7 ± 2.1                          | 3.5 ± 2.6                         | 2.3 ± 1.7                         | 4.5 ± 2.7                        |
| <b>Age at cohort entry</b>                                            | 46.3 ± 16.8                        | 43.5 ± 16.7                       | 46.9 ± 18.3                       | 48.7 ± 17.3                      |
| 18 – 29 years                                                         | 3124 (16.2)                        | 19911 (21.9)                      | 9887 (18.5)                       | 6257 (14.3)                      |
| 30 – 59 years                                                         | 12107 (62.8)                       | 55282 (60.8)                      | 30337 (56.9)                      | 25604 (58.3)                     |
| 60+                                                                   | 4037 (21.0)                        | 15731 (17.3)                      | 13076 (24.5)                      | 12031 (27.4)                     |
| <b>Male sex (%)</b>                                                   | 6881 (35.7)                        | 28098 (30.9)                      | 16806 (31.5)                      | 13202 (30.1)                     |
| <b>Obesity prior to cohort entry</b>                                  |                                    |                                   |                                   |                                  |
| Obese                                                                 | 2966 (15.4)                        | 13418 (14.8)                      | 7595 (14.2)                       | 6378 (14.5)                      |
| Non-Obese                                                             | 13791 (71.6)                       | 66695 (73.4)                      | 39189 (73.5)                      | 32400 (73.8)                     |
| Missing                                                               | 2511 (13.0)                        | 10811 (11.9)                      | 6516 (12.2)                       | 5114 (11.7)                      |
| <b>Smoking prior to cohort entry</b>                                  |                                    |                                   |                                   |                                  |
| Ever Smoker                                                           | 9016 (46.8)                        | 41622 (45.8)                      | 24565 (46.1)                      | 19496 (44.4)                     |
| Never Smoker                                                          | 7932 (41.2)                        | 37826 (41.6)                      | 22587 (42.4)                      | 18912 (43.1)                     |
| Missing                                                               | 2320 (12.0)                        | 11476 (12.6)                      | 6148 (11.5)                       | 5484 (12.5)                      |
| <b>Alcohol abuse prior to cohort entry</b>                            | 460 (2.4)                          | 1181 (1.3)                        | 929 (1.7)                         | 549 (1.3)                        |
| <b>Diagnosis at or prior to cohort entry</b>                          |                                    |                                   |                                   |                                  |
| Depression                                                            | 14177 (73.6)                       | 74975 (82.5)                      | 36401 (68.3)                      | 31021 (70.7)                     |
| Anxiety                                                               | 3072 (15.9)                        | 9283 (10.2)                       | 10938 (20.5)                      | 8768 (20.0)                      |
| Both                                                                  | 2019 (10.5)                        | 6666 (7.3)                        | 5961 (11.2)                       | 4103 (9.3)                       |
| <b>Record of depression/anxiety in the year prior to cohort entry</b> |                                    |                                   |                                   |                                  |
| Depression                                                            | 126312 (60.9)                      | 10490 (54.4)                      | 29052 (54.5)                      | 63082 (69.4)                     |
| Severe                                                                | 8106 (3.9)                         | 1269 (6.6)                        | 2116 (4.0)                        | 3161 (3.5)                       |
| Moderate                                                              | 47375 (22.8)                       | 4156 (21.6)                       | 11684 (21.9)                      | 23774 (26.1)                     |
| Mild                                                                  | 70831 (34.2)                       | 5065 (26.3)                       | 15252 (28.6)                      | 36147 (39.8)                     |
| Anxiety                                                               | 19379 (9.3)                        | 1759 (9.1)                        | 7498 (14.1)                       | 5041 (5.5)                       |
| Both                                                                  | 29593 (14.3)                       | 3848 (20.0)                       | 8495 (15.9)                       | 10916 (12.0)                     |
| None                                                                  | 32100 (15.5)                       | 3171 (16.5)                       | 8255 (15.5)                       | 11885 (13.1)                     |
| <b>Suicide attempt in year prior to entry</b>                         | 639 (3.3)                          | 1156 (1.3)                        | 706 (1.3)                         | 351 (0.8)                        |

Results are expressed as Number (%) or Mean ± SD

### Supplemental Table 3

#### Cardiovascular co-morbidity of cohort members in the year prior to cohort entry by cohort entry-defining antidepressant agent

|                                    | <b>Venlafaxine<br/>(n = 19268)</b> | <b>Fluoxetine<br/>(n = 90924)</b> | <b>Citalopram<br/>(n = 53300)</b> | <b>Dosulepin<br/>(n = 43892)</b> |
|------------------------------------|------------------------------------|-----------------------------------|-----------------------------------|----------------------------------|
| Acute myocardial infarction        |                                    |                                   |                                   |                                  |
| 0 – 3 months                       | 16 (0.1)                           | 101 (0.1)                         | 73 (0.1)                          | 33 (0.1)                         |
| 3 – 6 months                       | 7 (0.0)                            | 61 (0.1)                          | 73 (0.1)                          | 29 (0.1)                         |
| 6 months – 1 year                  | 19 (0.1)                           | 112 (0.1)                         | 75 (0.1)                          | 48 (0.1)                         |
| Cardiac revascularization          | 34 (0.2)                           | 154 (0.2)                         | 118 (0.2)                         | 50 (0.1)                         |
| Intraventricular conduction delay  | 2 (0.0)                            | 4 (0.0)                           | 11 (0.0)                          | 3 (0.0)                          |
| Supraventricular arrhythmia        | 100 (0.5)                          | 449 (0.5)                         | 440 (0.8)                         | 185 (0.4)                        |
| Left ventricular hypertrophy       | 5 (0.0)                            | 22 (0.0)                          | 21 (0.0)                          | 6 (0.0)                          |
| Coronary artery disease and angina | 237 (1.2)                          | 1224 (1.3)                        | 852 (1.6)                         | 628 (1.4)                        |
| Congestive heart failure (CHF)     | 107 (0.6)                          | 505 (0.6)                         | 376 (0.7)                         | 223 (0.5)                        |
| Severe CHF*                        | 80 (0.4)                           | 369 (0.4)                         | 288 (0.5)                         | 147 (0.3)                        |
| Ischemic stroke                    | 120 (0.6)                          | 484 (0.5)                         | 337 (0.6)                         | 215 (0.5)                        |
| Transient ischemic attack          | 82 (0.4)                           | 351 (0.4)                         | 274 (0.5)                         | 207 (0.5)                        |
| Peripheral vascular disease        | 66 (0.3)                           | 265 (0.3)                         | 167 (0.3)                         | 143 (0.3)                        |
| Diabetes                           | 521 (2.7)                          | 2133 (2.3)                        | 1521 (2.9)                        | 977 (2.2)                        |
| Hyperlipidemia                     | 164 (0.9)                          | 590 (0.6)                         | 502 (0.9)                         | 320 (0.7)                        |
| Hypertension                       | 538 (2.8)                          | 2157 (2.4)                        | 1515 (2.8)                        | 1365 (3.1)                       |
| Hypokalemia                        | 23 (0.1)                           | 86 (0.1)                          | 56 (0.1)                          | 43 (0.1)                         |
| Hypomagnesemia                     | 0 (0.0)                            | 2 (0.0)                           | 0 (0.0)                           | 1 (0.0)                          |
| Conduction disorder                | 2 (0.0)                            | 10 (0.0)                          | 6 (0.0)                           | 2 (0.0)                          |

Results are expressed as Number (%)

\*Severe CHF is defined by the presence of a diagnosis for decompensated CHF or by any CHF diagnosis followed by a prescription of a loop diuretic within 3 months.

**Supplemental Table 4**

**Non-cardiovascular co-morbidity and co-medication use in the year prior to cohort entry of cohort members by entry-defining antidepressant agent**

|                                                       | <b>Venlafaxine<br/>(n = 19268)</b> | <b>Fluoxetine<br/>(n = 90924)</b> | <b>Citalopram<br/>(n = 53300)</b> | <b>Dosulepin<br/>(n = 43892)</b> |
|-------------------------------------------------------|------------------------------------|-----------------------------------|-----------------------------------|----------------------------------|
| <b>Co-morbidity</b>                                   |                                    |                                   |                                   |                                  |
| Rheumatoid Arthritis                                  | 46 (0.2)                           | 274 (0.3)                         | 149 (0.3)                         | 147 (0.3)                        |
| Epilepsy                                              | 113 (0.6)                          | 341 (0.4)                         | 338 (0.6)                         | 184 (0.4)                        |
| Schizophrenia                                         | 91 (0.5)                           | 143 (0.2)                         | 98 (0.2)                          | 43 (0.1)                         |
| <b>Other Medication use</b>                           |                                    |                                   |                                   |                                  |
| NSAID                                                 | 5819 (30.2)                        | 24334 (26.8)                      | 15895 (29.8)                      | 13859 (31.6)                     |
| Anti psychotic                                        | 2681 (13.9)                        | 5967 (6.6)                        | 4291 (8.1)                        | 3748 (8.5)                       |
| Benzodiazepine                                        | 4201 (21.8)                        | 11677 (12.8)                      | 8502 (16.0)                       | 7991 (18.2)                      |
| Mood stabilizer*                                      | 997 (5.2)                          | 1575 (1.7)                        | 1347 (2.5)                        | 897 (2.0)                        |
| Anti arrhythmics                                      | 128 (0.7)                          | 492 (0.5)                         | 454 (0.9)                         | 195 (0.4)                        |
| Lipid regulating drugs                                | 886 (4.6)                          | 2788 (3.1)                        | 2858 (5.4)                        | 1317 (3.0)                       |
| Loop diuretics                                        | 740 (3.8)                          | 2894 (3.2)                        | 2321 (4.4)                        | 1479 (3.4)                       |
| <b>Drugs with potential effect on QT-prolongation</b> |                                    |                                   |                                   |                                  |
| Strong evidence**                                     | 4665 (24.2)                        | 16630 (18.3)                      | 10041 (18.8)                      | 9076 (20.7)                      |
| Soft evidence ***                                     | 1513 (7.9)                         | 4504 (5.0)                        | 3158 (5.9)                        | 2718 (6.2)                       |

Results are expressed as Number (%)

\*Mood stabilizers include: carbamazepine, clonazepam, gabapentin, lamotrigine, lithium carbonate, lithium citrate, sodium valproate, topiramate, valproate semisodium, valproic acid

\*\*Drugs with strong evidence of potential effect on QT prolongation include: amiodarone hydrochloride, amitriptyline hydrochloride, arsenic trioxide, chloroquine phosphate, chloroquine sulphate, chlorpromazine, chlorpromazine hydrochloride, cisapride monohydrate, clarithromycin, clozapine, desipramine hydrochloride, disopyramide, disopyramide phosphate, domperidone, domperidone maleate, doxepin hydrochloride, droperidol, erythromycin, erythromycin estolate, erythromycin ethylsuccinate, erythromycin lactobionate, erythromycin stearate, flecainide acetate, halofantrine, haloperidol, haloperidol decanoate, hydroxychloroquine sulphate, imipramine hydrochloride, methadone hydrochloride, pentamidine isetionate, pimozone, procainamide hydrochloride, quetiapine fumarate, quinidine sulphate, risperidone, sotalol hydrochloride, sparfloxacin, terfenadine, thioridazine hydrochloride

\*\*\*Drugs with soft evidence of potential effect on QT prolongation include: alfuzosin hydrochloride, amantadine hydrochloride, azithromycin dihydrate, chloral hydrate, ciprofloxacin, ciprofloxacin lactate, dolasetron mesilate, fosfocarnet, fosphenytoin sodium, granisetron, granisetron hydrochloride, indapamide, isradipine, levofloxacin, levofloxacin hemihydrate, lithium carbonate, lithium citrate, moexipril hydrochloride, moxifloxacin hydrochloride, nifedipine hydrochloride, octreotide, ofloxacin, ofloxacin hydrochloride, ondansetron, ondansetron hydrochloride dihydrate, quinine, quinine bisulphate, quinine dihydrochloride, quinine hydrochloride, quinine sulphate, tacrolimus, tamoxifen citrate, telithromycin,

tizanidine hydrochloride, vardenafil hydrochloride trihydrate, voriconazole

### Supplemental Table 5

**Crude and adjusted odds ratios of sudden cardiac death or near-death associated with current use of venlafaxine relative to current fluoxetine, citalopram and dosulepin use, using the restricted outcome definition of acute ventricular tachyarrhythmia and sudden cardiac death only**

|                         | <b>Cases<br/>(n=263)</b> | <b>Controls<br/>(n=6995)</b> | <b>Crude OR</b> | <b>Adjusted* OR<br/>(95% CI)</b> |
|-------------------------|--------------------------|------------------------------|-----------------|----------------------------------|
| Current use of          |                          |                              |                 |                                  |
| Venlafaxine             | 10 (3.80)                | 276 (3.95)                   |                 |                                  |
| Versus fluoxetine       | 27 (10.27)               | 592 (8.46)                   | 0.79            | 0.73 (0.34 to 1.58)              |
| Versus citalopram       | 25 (9.51)                | 513 (7.33)                   | 0.78            | 0.73 (0.34 to 1.58)              |
| Versus dosulepin        | 12 (4.56)                | 425 (6.08)                   | 1.39            | 1.05 (0.43 to 2.57)              |
| Versus any of the three | 64 (24.33)               | 1530 (21.87)                 | 0.89            | 0.78 (0.39 to 1.59)              |

Past user and non-user are included in the model

\*Adjusted for BMI  $\geq$  30, smoking status, alcohol abuse, depression severity, suicide attempt, diabetes, CABG & endosc CA procedures, supraventricular arrhythmias, Left ventricular hypertrophy, CAD and angina, CHF, severe CHF, ischaemic stroke, TIA, peripheral vascular disease, hyperlipidaemia, hypertension, hypokalemia, rheumatoid arthritis, epilepsy, schizophrenia, use of anti psychotics, benzodiazepine, mood stabilizer, anti-arrhythmics, drugs with some evidence of prolonging QT, drugs with stronger evidence of prolonging QT, lipid regulating drugs, loop diuretics all in the year prior to the year before index date and AMI in the year prior index date

### Supplemental Table 6

**Crude and adjusted odds ratios of sudden cardiac death or near-death associated with current use of venlafaxine relative to current fluoxetine, citalopram, dosulepin use adding a grace period of 15 days to the duration of prescriptions**

|                         | <b>Cases<br/>(n=568)</b> | <b>Controls<br/>(n=14812)</b> | <b>Crude OR</b> | <b>Adjusted* OR<br/>(95% CI)</b> |
|-------------------------|--------------------------|-------------------------------|-----------------|----------------------------------|
| Current use of          |                          |                               |                 |                                  |
| Venlafaxine             | 24 (4.23)                | 622 (4.20)                    |                 |                                  |
| Versus fluoxetine       | 77 (13.56)               | 1532 (10.34)                  | 0.72            | 0.69 (0.42 to 1.14)              |
| Versus citalopram       | 48 (8.45)                | 1242 (8.39)                   | 0.97            | 0.92 (0.55 to 1.55)              |
| Versus dosulepin        | 44 (7.75)                | 1172 (7.91)                   | 1.05            | 0.87 (0.51 to 1.49)              |
| Versus any of the three | 169 (29.75)              | 3946 (26.64)                  | 0.88            | 0.81 (0.51 to 1.28)              |

Past user and non-user are included in the model

\*Adjusted for BMI $\geq$  30, smoking status, alcohol abuse, depression severity, suicide attempt, diabetes, CABG & endosc CA procedures, supraventricular arrhythmias, Left ventricular hypertrophy, CAD and angina, CHF, severe CHF, ischaemic stroke, TIA, peripheral vascular disease, hyperlipidaemia, hypertension, hypokalemia, rheumatoid arthritis, epilepsy, schizophrenia, use of anti psychotics, benzodiazepine, mood stabilizer, anti-arrhythmics, drugs with some evidence of prolonging QT, drugs with stronger evidence of prolonging QT, lipid regulating drugs, loop diuretics all in the year prior to the year before index date and AMI in the year prior index date



### Supplemental Table 7

**Crude and adjusted odds ratios of sudden cardiac death or near-death associated with current use of venlafaxine relative to current fluoxetine, citalopram and dosulepin use using the criterion of a minimum 10% change in odds ratio to keep covariates for adjustment**

|                   | <b>Cases<br/>(n=568)</b> | <b>Controls<br/>(n=14812)</b> | <b>Crude OR</b> | <b>Adjusted* OR<br/>(95% CI)</b> |
|-------------------|--------------------------|-------------------------------|-----------------|----------------------------------|
| Current use of    |                          |                               |                 |                                  |
| Venlafaxine       | 18 (3.17)                | 544 (3.67)                    |                 |                                  |
| Versus fluoxetine | 63 (11.09)               | 1281 (8.65)                   | 0.65            | 0.63 (0.36 to 1.09)              |
| Versus citalopram | 39 (6.87)                | 1079 (7.28)                   | 0.90            | 0.88 (0.49 to 1.57)              |
| Versus dosulepin  | 35 (6.16)                | 1012 (6.83)                   | 0.99            | 0.84 (0.46 to 1.52)              |

Past user and non-user are included in the model

Covariates kept for adjustment: alcohol abuse, diabetes, benzodiazepine, drugs with stronger evidence of prolonging QT, loop diuretics, all in the year prior to the year before index date, AMI in the 3 months before index date.

### Supplemental Table 8

**Crude and adjusted odds ratios of sudden cardiac death or near-death associated with current use of venlafaxine relative to current fluoxetine, citalopram and dosulepin use restricted to patients with the diagnosis of depression**

|                         | <b>Cases<br/>(n=481)</b> | <b>Controls<br/>(n=13218)</b> | <b>Crude OR</b> | <b>Adjusted* OR<br/>(95% CI)</b> |
|-------------------------|--------------------------|-------------------------------|-----------------|----------------------------------|
| Current use of          |                          |                               |                 |                                  |
| Venlafaxine             | 16 (3.33)                | 508 (3.84)                    |                 |                                  |
| Versus fluoxetine       | 58 (12.06)               | 1179 (8.92)                   | 0.61            | 0.62 (0.35 to 1.12)              |
| Versus citalopram       | 33 (6.86)                | 972 (7.35)                    | 0.92            | 0.92 (0.49 to 1.72)              |
| Versus Dosulepin        | 28 (5.82)                | 861 (6.51)                    | 0.96            | 0.83 (0.44 to 1.58)              |
| Versus any of the three | 119 (24.74)              | 3012 (22.79)                  | 0.78            | 0.76 (0.44 to 1.31)              |

Past user and non-user are included in the model

\*Adjusted for BMI $\geq$  30, smoking status, alcohol abuse, depression severity, suicide attempt, diabetes, CABG & endosc CA procedures, supraventricular arrhythmias, Left ventricular hypertrophy, CAD and angina, CHF, severe CHF, ischaemic stroke, TIA, peripheral vascular disease, hyperlipidaemia, hypertension, hypokalemia, rheumatoid arthritis, epilepsy, schizophrenia, use of anti psychotics, benzodiazepine, mood stabilizer, anti-arrhythmics, drugs with some evidence of prolonging QT, drugs with stronger evidence of prolonging QT, lipid regulating drugs, loop diuretics all in the year prior to the year before index date and AMI in the year prior index date

### Supplemental Table 9

**Crude and adjusted odds ratios of sudden cardiac death or near-death associated with current use of venlafaxine relative to current fluoxetine, citalopram and dosulepin use restricted to patients with no acute myocardial infarction prior to the index date**

|                         | <b>Cases<br/>(n=530)</b> | <b>Controls<br/>(n=13604)</b> | <b>Crude OR</b> | <b>Adjusted* OR<br/>(95% CI)</b> |
|-------------------------|--------------------------|-------------------------------|-----------------|----------------------------------|
| Current use of          |                          |                               |                 |                                  |
| Venlafaxine             | 18 (3.40)                | 494 (3.63)                    |                 |                                  |
| Versus fluoxetine       | 57 (10.75)               | 1175 (8.64)                   | 0.73            | 0.73 (0.42 to 1.27)              |
| Versus citalopram       | 35 (6.60)                | 976 (7.17)                    | 1.02            | 0.96 (0.53 to 1.74)              |
| Versus Dosulepin        | 35 (6.60)                | 960 (7.06)                    | 1.04            | 0.91 (0.50 to 1.66)              |
| Versus any of the three | 127 (23.96)              | 3111 (22.87)                  | 0.90            | 0.85 (0.51 to 1.42)              |

Past user and non-user are included in the model

\*Adjusted for BMI $\geq$  30, smoking status, alcohol abuse, depression severity, suicide attempt, diabetes, CABG & endosc CA procedures, supraventricular arrhythmias, Left ventricular hypertrophy, CAD and angina, CHF, severe CHF, ischaemic stroke, TIA, peripheral vascular disease, hyperlipidaemia, hypertension, hypokalemia, rheumatoid arthritis, epilepsy, schizophrenia, use of anti psychotics, benzodiazepine, mood stabilizer, anti-arrhythmics, drugs with some evidence of prolonging QT, drugs with stronger evidence of prolonging QT, lipid regulating drugs, loop diuretics all in the year prior to the year before index date.

**Supplemental Table 10**

**Crude and adjusted odds ratios of sudden cardiac death or near-death associated with current use of venlafaxine, fluoxetine, citalopram and dosulepin, comparing switching to no switching from the cohort-entry defining antidepressant**

|                    | <b>Cases<br/>(n=568)</b> | <b>Controls<br/>(n=14812)</b> | <b>Crude OR<br/>(95% CI)</b> | <b>Adjusted OR<br/>(95% CI)</b> |
|--------------------|--------------------------|-------------------------------|------------------------------|---------------------------------|
| <b>Venlafaxine</b> |                          |                               |                              |                                 |
| No switch          | 14 (2.46)                | 318 (2.15)                    | 1.00 (Reference)             | 1.00 (Reference)                |
| Switch             | 4 (0.70)                 | 226 (1.53)                    | 0.36 (0.12 to 1.13)          | 0.31 (0.10 to 0.99)             |
| <b>Fluoxetine</b>  |                          |                               |                              |                                 |
| No switch          | 51 (8.98)                | 1104 (7.45)                   | 1.00 (Reference)             | 1.00 (Reference)                |
| Switch             | 12 (2.11)                | 177 (1.19)                    | 1.37 (0.71 to 2.66)          | 1.65 (0.83 to 3.28)             |
| <b>Citalopram</b>  |                          |                               |                              |                                 |
| No switch          | 33 (5.81)                | 852 (5.75)                    | 1.00 (Reference)             | 1.00 (Reference)                |
| Switch             | 6 (1.06)                 | 227 (1.53)                    | 0.58 (0.24 to 1.43)          | 0.63 (0.25 to 1.56)             |
| <b>Dosulepin</b>   |                          |                               |                              |                                 |
| No switch          | 30 (5.28)                | 853 (5.76)                    | 1.00 (Reference)             | 1.00 (Reference)                |
| Switch             | 5 (0.88)                 | 159 (1.07)                    | 0.88 (0.33 to 2.33)          | 0.85 (0.32 to 2.27)             |

Past user and non-user are included in the model

\*Adjusted for BMI  $\geq$  30, smoking status, alcohol abuse, depression severity, suicide attempt, diabetes, CABG & endosc CA procedures, supraventricular arrhythmias, Left ventricular hypertrophy, CAD and angina, CHF, severe CHF, ischaemic stroke, TIA, peripheral vascular disease, hyperlipidaemia, hypertension, hypokalemia, hypokalaemia, rheumatoid arthritis, epilepsy, schizophrenia, use of anti psychotics, benzodiazepine, mood stabilizer, anti-arrhythmics, drugs with some evidence of prolonging QT, drugs with stronger evidence of prolonging QT, lipid regulating drugs, loop diuretics all in the year prior to the year before index date and AMI in the year prior index date.
